# Supplementary material for: Do Power Lines and Protected Areas Present a Catch-22 Situation for Cape Vultures (Gyps coprotheres)?
Source: PubMed Central journal article supplement (PMC3793913; doi:10.1371/journal.pone.0076794), 2013-10-09
Supplement: pone.0076794.s003.pdf [file pone.0076794.s003.pdf]

**Table S1. Association of GPS tracking locations and home ranges of nine Cape vultures with the transmission power line network.**

| Vulture ID   | Proportion of 99% KDE occupied by Tx buffer (%) | Proportion of stationary locations in 99% KDE in Tx buffer (%) | Proportion of 50% KDE occupied by Tx buffer (%) | Proportion of stationary locations in 50% KDE in Tx buffer (%) | Stationary location density (locations·km <sup>-2</sup> ) |                   |         |                   |
|--------------|-------------------------------------------------|----------------------------------------------------------------|-------------------------------------------------|----------------------------------------------------------------|-----------------------------------------------------------|-------------------|---------|-------------------|
|              |                                                 |                                                                |                                                 |                                                                | 99% KDE                                                   | 99% KDE Tx buffer | 50% KDE | 50% KDE Tx buffer |
| <b>AG314</b> | 0.39                                            | 18.31                                                          | 0.98                                            | 18.70                                                          | 0.015                                                     | 0.730             | 0.222   | 4.233             |
| <b>AG329</b> | 0.68                                            | 19.17                                                          | 1.25                                            | 20.65                                                          | 0.009                                                     | 0.267             | 0.050   | 0.827             |
| <b>AG349</b> | 0.59                                            | 30.99                                                          | 0.80                                            | 30.60                                                          | 0.010                                                     | 0.513             | 0.067   | 2.563             |
| <b>AG355</b> | 0.63                                            | 32.07                                                          | 1.18                                            | 32.08                                                          | 0.009                                                     | 0.458             | 0.098   | 2.647             |
| <b>AG382</b> | 0.66                                            | 2.78                                                           | 0.51                                            | 1.56                                                           | 0.001                                                     | 0.006             | 0.010   | 0.029             |
| <b>AG313</b> | 0.63                                            | 43.59                                                          | 0.95                                            | 46.73                                                          | 0.004                                                     | 0.312             | 0.046   | 2.245             |
| <b>AG352</b> | 0.35                                            | 8.74                                                           | 0.61                                            | 10.71                                                          | 0.002                                                     | 0.043             | 0.009   | 0.156             |
| <b>AG353</b> | 0.39                                            | 14.71                                                          | 0.45                                            | 17.77                                                          | 0.003                                                     | 0.121             | 0.013   | 0.530             |
| <b>AG383</b> | 0.37                                            | 15.03                                                          | 0.52                                            | 19.04                                                          | 0.001                                                     | 0.050             | 0.008   | 0.294             |
| <b>Mean±</b> | 0.52                                            | 20.60                                                          | 0.81                                            | 21.98                                                          | 0.006                                                     | 0.278             | 0.058   | 1.503             |
| <b>SD</b>    | 0.14                                            | 12.74                                                          | 0.30                                            | 13.09                                                          | 0.005                                                     | 0.250             | 0.069   | 1.470             |
